# Supplementary material for: Effect of Strobilanthes tonkinensis Lindau Addition on Black Tea Flavor Quality and Volatile Metabolite Content
Source: MDPI journal article supplement (doi:10.3390/foods11121678), 2022-06-07
Supplement: s1 [file s1]

**Table S1.** List of the all the volatile metabolites in BT, BoS, and STL.

| No. | Name                                                                | Retention Time (min) | RI <sup>A</sup> | RI <sup>B</sup> | CAS number   | BT           | BoS          | STL          |
|-----|---------------------------------------------------------------------|----------------------|-----------------|-----------------|--------------|--------------|--------------|--------------|
| 1   | Dimethyl ether                                                      | 2.15                 | 699             | -               | 115-10-6     | 0.011±0.005b | 0.023±0.022a | 0.022±0.011a |
| 2   | 3-methyl-butanal                                                    | 2.20                 | 700             | 678             | 590-86-3     | 0.256±0.042b | 0.296±0.050a | 0.057±0.006c |
| 3   | 2-methyl-butanal                                                    | 2.28                 | 702             | 682             | 96-17-3      | 0.305±0.027b | 0.351±0.210a | 0.081±0.011c |
| 4   | Anhydride propanoic acid                                            | 2.41                 | 706             | -               | 123-62-6     | 0.183±0.016a | 0.171±0.085a | 0.040±0.004b |
| 5   | Pentanal                                                            | 2.57                 | 711             | 701             | 110-62-3     | 0.051±0.006a | 0.041±0.020a | 0.021±0.003b |
| 6   | Furan, 2-ethyl-                                                     | 2.62                 | 712             | 712             | 3208-16-0    | 0.057±0.003a | 0.052±0.003a | 0.006±0.001b |
| 7   | 1-Butanol, 3-methyl-                                                | 3.02                 | 763             | 734             | 123-51-3     | 0.020±0.002a | 0.018±0.010a | 0.002±0.002b |
| 8   | 1-Butanol, 2-methyl-                                                | 3.07                 | 765             | 762             | 137-32-6     | 0.005±0.001a | 0.005±0.003a | 0.006±0.009a |
| 9   | 1-Pentanol                                                          | 3.56                 | 778             | 768             | 71-41-0      | 0.040±0.004a | 0.035±0.014a | 0.016±0.002b |
| 10  | Toluene                                                             | 3.61                 | 780             | 773             | 108-88-3     | 0.076±0.022b | 0.089±0.011a | 0.051±0.008c |
| 11  | 4-Hexen-3-one                                                       | 3.66                 | 781             | -               | 2497-21-4    | 0.015±0.002a | 0.013±0.004a | 0.003±0.000b |
| 12  | Furan, 2-methoxy-                                                   | 4.28                 | 799             | -               | 25414-22-6   | 0.028±0.001b | 0.045±0.014a | 0.004±0.000c |
| 13  | Hexanal                                                             | 4.30                 | 799             | 800             | 66-25-1      | 0.396±0.020a | 0.223±0.084b | 0.042±0.007c |
| 14  | (E)-2-hexenal                                                       | 5.96                 | 846             | 854             | 6728-26-3    | 1.214±0.039a | 0.661±0.117b | 0.042±0.008c |
| 15  | 1-Methyl-1H-1,2,4-triazole                                          | 6.07                 | 849             | -               | 6086-21-1    | 1.214±0.039a | 0.661±0.117b | 0.042±0.008c |
| 16  | (E)-3-hexen-1-ol                                                    | 6.08                 | 849             | 844             | 928-97-2     | 0.774±0.062b | 0.963±0.229a | 0.058±0.011c |
| 17  | Ethylbenzene                                                        | 6.25                 | 854             | 857             | 100-41-4     | 0.004±0.000a | 0.003±0.001a | 0.003±0.001a |
| 18  | cis-2-methyl- cyclopentanol                                         | 6.44                 | 860             | -               | 25144-05-2   | 0.085±0.006b | 0.176±0.036a | 0.011±0.015a |
| 19  | 1-hexanol                                                           | 6.52                 | 862             | 879             | 111-27-3     | 0.489±0.019b | 0.751±0.191a | 0.020±0.005c |
| 20  | Styrene                                                             | 7.32                 | 884             | 890             | 100-42-5     | 0.020±0.001b | 0.015±0.001b | 0.036±0.003a |
| 21  | p-Xylene                                                            | 7.40                 | 887             | 888             | 106-42-3     | 0.006±0.000a | 0.004±0.001a | 0.001±0.002b |
| 22  | Heptanal                                                            | 7.76                 | 897             | 903             | 111-71-7     | 0.093±0.003a | 0.068±0.016b | 0.008±0.001c |
| 23  | Methoxy-phenyl-oxime_                                               | 7.86                 | 900             | -               | 1000222-86-6 | 0.105±0.030a | 0.078±0.008b | 0.021±0.011c |
| 24  | Pyrolo[3,2-d]pyrimidin-2,4(1H,3H)-dione                             | 7.93                 | 902             | -               | 65996-50-1   | 0.074±0.020a | 0.055±0.005b | 0.016±0.008c |
| 25  | (S)-(+)-5-Methyl-1-heptanol                                         | 9.98                 | 959             | -               | 57803-73-3   | 0.044±0.007a | 0.036±0.006a | 0.000±0.000b |
| 26  | Benzaldehyde                                                        | 10.07                | 962             | 961             | 100-52-7     | 1.172±0.105b | 0.797±0.232c | 1.547±0.109a |
| 27  | 1-Heptanol                                                          | 10.56                | 976             | 969             | 111-70-6     | 0.014±0.007b | 0.012±0.001b | 0.033±0.028a |
| 28  | 1-octen-3-ol                                                        | 10.94                | 986             | 976             | 3391-86-4    | 0.169±0.009c | 0.837±0.131b | 1.366±0.150a |
| 29  | 2-methyl-pentanoic acid anhydride                                   | 11.17                | 993             | -               | 63169-61-9   | 0.058±0.005a | 0.066±0.004a | 0.024±0.002b |
| 30  | 3-Octanone                                                          | 11.24                | 995             | 984             | 106-68-3     | 0.039±0.034a | 0.000±0.000b | 0.000±0.000b |
| 31  | 5-Hepten-2-one, 6-methyl-                                           | 11.27                | 996             | 985             | 110-93-0     | 0.016±0.001b | 0.016±0.001b | 0.025±0.003a |
| 32  | .beta.-Myrcene                                                      | 11.43                | 1000            | 992             | 123-35-3     | 0.132±0.006a | 0.128±0.035a | 0.011±0.009b |
| 33  | 3-Octanol                                                           | 11.61                | 1005            | 994             | 589-98-0     | 0.012±0.000c | 0.044±0.007b | 0.084±0.008a |
| 34  | Decane                                                              | 11.78                | 1010            | -               | 124-18-5     | 0.011±0.001c | 0.837±0.131a | 0.522±0.767b |
| 35  | Hexanoic acid, ethyl ester                                          | 11.82                | 1011            | 998             | 123-66-0     | 0.016±0.001a | 0.016±0.001a | 0.000±0.000b |
| 36  | Octanal                                                             | 11.91                | 1014            | 1005            | 124-13-0     | 0.030±0.001a | 0.021±0.002a | 0.004±0.000b |
| 37  | 4-Hexen-1-ol, (4E)-, acetate                                        | 12.16                | 1021            | -               | 1000352-71-9 | 0.008±0.003a | 0.004±0.003b | 0.005±0.006b |
| 38  | Acetic acid, hexyl ester                                            | 12.39                | 1027            | 1011            | 142-92-7     | 0.000±0.000a | 0.001±0.000a | 0.001±0.000a |
| 39  | 1,7,7-trimethyl-bicyclo[2.2.1]hept-2-ene                            | 12.42                | 1028            | 909             | 464-17-5     | 0.003±0.006b | 0.000±0.000c | 1.475±0.113a |
| 40  | o-Cymene                                                            | 12.75                | 1037            | 1026            | 527-84-4     | 0.042±0.013a | 0.028±0.006b | 0.020±0.010b |
| 41  | D-Limonene                                                          | 12.90                | 1041            | 1029            | 5989-27-5    | 0.020±0.002a | 0.018±0.004a | 0.004±0.001b |
| 42  | 2-ethyl-1-hexanol                                                   | 12.98                | 1044            | 1031            | 104-76-7     | 0.052±0.003b | 0.048±0.004b | 2.121±0.139a |
| 43  | 1-phenyl-1,2-propanediol                                            | 13.12                | 1048            | 1326            | 1855-09-0    | 0.556±0.057b | 0.566±0.057b | 1.663±0.144a |
| 44  | Cyclohexanone, 2,2,6-trimethyl-                                     | 13.14                | 1048            | 1023            | 2408-37-9    | 0.012±0.000a | 0.009±0.001b | 0.004±0.000c |
| 45  | 3,6,6-trimethyl-bicyclo[3.1.1]hept-2-ene                            | 13.36                | 1054            | -               | 4889-83-2    | 0.000±0.000b | 0.000±0.000b | 0.759±0.061a |
| 46  | Benzeneacetaldehyde                                                 | 13.52                | 1059            | 1043            | 122-78-1     | 9.160±0.633a | 8.502±0.755a | 0.557±0.095b |
| 47  | 3-Carene                                                            | 13.76                | 1066            | 1018            | 13466-78-9   | 0.000±0.000b | 0.000±0.000b | 0.758±0.061a |
| 48  | Isophorone                                                          | 14.16                | 1077            | 1118            | 78-59-1      | 0.041±0.001b | 0.025±0.002c | 2.423±0.252a |
| 49  | Acetophenone                                                        | 14.42                | 1084            | 1068            | 98-86-2      | 0.027±0.001b | 0.027±0.003b | 0.278±0.023a |
| 50  | Cyclooctyl alcohol                                                  | 14.57                | 1089            | -               | 696-71-9     | 0.012±0.001a | 0.014±0.001a | 0.001±0.001b |
| 51  | 3,3-Diethoxy-1-propyne                                              | 14.70                | 1092            | -               | 10160-87-9   | 0.155±0.010a | 0.157±0.010a | 0.061±0.053b |
| 52  | Ethyl 2-(5-methyl-5-vinyltetrahydrofuran-2-yl)propan-2-yl carbonate | 15.34                | 1110            | -               | 1000373-80-3 | 0.902±0.070b | 0.886±0.080b | 0.963±0.100a |
| 53  | Benzene, 4-ethenyl-1,2-dimethyl-                                    | 15.37                | 1111            | -               | 27831-13-6   | 0.006±0.002a | 0.005±0.002a | 0.007±0.006a |
| 54  | 3,5-Octadien-2-one                                                  | 15.56                | 1116            | 1098            | 38284-27-4   | 0.015±0.001b | 0.014±0.002b | 0.083±0.011a |
| 55  | 3,7-Dimethyl-2,3,3a,4,5,6-hexahydro-1-benzofuran                    | 15.61                | 1118            | -               | 1000099-60-6 | 0.033±0.002c | 0.062±0.048b | 1.827±0.164a |
| 56  | 2-Carbethoxy-N-methylpyrrolidine                                    | 15.94                | 1127            | -               | 30727-23-2   | 0.130±0.005b | 0.129±0.008b | 0.192±0.018a |
| 57  | Linalool                                                            | 15.95                | 1127            | 1100            | 78-70-6      | 2.247±0.115a | 2.232±0.132a | 0.095±0.021b |
| 58  | Nonanal                                                             | 16.04                | 1130            | 1102            | 124-19-6     | 0.121±0.010a | 0.107±0.006b | 0.019±0.001c |
| 59  | Phenylethyl alcohol                                                 | 16.29                | 1137            | 1116            | 60-12-8      | 1.785±0.142a | 1.887±0.222a | 0.461±0.114b |

|     |                                                                            |       |      |      |              |              |               |               |
|-----|----------------------------------------------------------------------------|-------|------|------|--------------|--------------|---------------|---------------|
| 60  | 4-chloro-2-methyl-1-phenyl-3-buten-1-ol                                    | 15.94 | 1127 | -    | 1000153-34-9 | 0.219±0.011b | 0.217±0.013b  | 1.263±0.370a  |
| 61  | 2-Undecene, 9-methyl-, (Z)-                                                | 16.49 | 1143 | -    | 74630-45-8   | 0.010±0.002a | 0.006±0.001b  | 0.003±0.000c  |
| 62  | 3,3,5-trimethyl- heptane                                                   | 15.94 | 1127 | -    | 7154-80-5    | 0.378±0.151a | 0.023±0.012b  | 0.016±0.004b  |
| 63  | Benzene, 1-isocyano-3-methyl-                                              | 17.29 | 1165 | -    | 20600-54-8   | 0.001±0.000c | 0.005±0.001b  | 0.048±0.013a  |
| 64  | 2,4,6-Octatriene, 2,6-dimethyl-                                            | 17.41 | 1168 | 1144 | 673-84-7     | 0.020±0.003a | 0.020±0.005a  | 0.003±0.002b  |
| 65  | 9-methylheptadecane                                                        | 17.53 | 1172 | -    | 26741-18-4   | 0.003±0.000b | 0.005±0.001a  | 0.002±0.002b  |
| 66  | Sulfurous acid, isobutyl pentyl ester                                      | 17.73 | 1178 | -    | 1000309-13-8 | 0.009±0.001a | 0.006±0.000b  | 0.005±0.002b  |
| 67  | 3-Ethyl-3-methylheptane                                                    | 17.97 | 1184 | -    | 17302-01-1   | 0.002±0.002b | 0.001±0.000b  | 0.005±0.005a  |
| 68  | 2-Oxo-4-phenyl-6-(4-chlorophenyl)-1,2-di-hydropyrimidine                   | 18.11 | 1188 | -    | 24030-13-5   | 0.007±0.001b | 0.015±0.011a  | 0.004±0.000b  |
| 69  | 1-Nonanol                                                                  | 18.55 | 1201 | 1186 | 143-08-8     | 0.047±0.000b | 0.061±0.002b  | 0.497±0.065a  |
| 70  | Linalool oxide (pyranoid)                                                  | 18.63 | 1203 | 1183 | 14049-11-7   | 0.192±0.017b | 0.174±0.027b  | 7.846±0.370a  |
| 71  | Naphthalene                                                                | 18.86 | 1209 | 1191 | 91-20-3      | 0.033±0.002b | 0.028±0.002b  | 0.116±0.002a  |
| 72  | 2-methoxy-3-(2-methylpropyl)-Pyrazine                                      | 18.89 | 1210 | 1187 | 24683-00-9   | 0.003±0.000b | 0.003±0.000b  | 0.615±0.022a  |
| 73  | (Z)-butanoic acid, 3-hexenyl ester                                         | 19.14 | 1217 | 1186 | 16491-36-4   | 0.022±0.004c | 0.035±0.006b  | 1.317±1.003a  |
| 74  | L- $\alpha$ -Terpineol                                                     | 19.23 | 1220 | 1187 | 10482-56-1   | 0.008±0.007b | 0.014±0.003b  | 0.121±0.008a  |
| 75  | 1-dodecanol                                                                | 19.30 | 1222 | 1188 | 112-53-8     | 0.001±0.001b | 0.001±0.001b  | 2.032±0.133a  |
| 76  | Methyl salicylate                                                          | 19.36 | 1223 | 1190 | 119-36-8     | 0.722±0.179a | 0.690±0.059a  | 0.374±0.566b  |
| 77  | 1,3-Cyclohexadiene-1-carboxaldehyde, 2,6,6-trimethyl-                      | 19.37 | 1224 | 1197 | 116-26-7     | 0.029±0.012b | 0.027±0.002b  | 0.036±0.007a  |
| 78  | Dodecane                                                                   | 19.62 | 1231 | -    | 112-40-3     | 0.028±0.002b | 0.032±0.007b  | 0.068±0.008a  |
| 79  | Decanal                                                                    | 19.81 | 1236 | 1200 | 112-31-2     | 0.009±0.001a | 0.011±0.001a  | 0.005±0.000b  |
| 80  | Decane, 5-ethyl-5-methyl-                                                  | 20.04 | 1243 | -    | 17312-74-2   | 0.008±0.001b | 0.011±0.001a  | 0.000±0.000c  |
| 81  | 1-Cyclohexene-1-carboxaldehyde, 2,6,6-trimethyl-                           | 20.33 | 1251 | 1214 | 432-25-7     | 0.084±0.003a | 0.059±0.004b  | 0.068±0.002b  |
| 82  | cis-3-Hexenyl- $\alpha$ -methylbutyrate                                    | 20.80 | 1264 | 1233 | 53398-85-9   | 0.061±0.003b | 0.067±0.005b  | 1.124±0.323a  |
| 83  | n-Valeric acid cis-3-hexenyl ester                                         | 20.93 | 1268 | 1235 | 35852-46-1   | 0.017±0.001b | 0.021±0.003b  | 15.670±4.899a |
| 84  | Valeric anhydride                                                          | 20.95 | 1268 | -    | 2082-59-9    | 0.010±0.001a | 0.009±0.001a  | 0.000±0.000b  |
| 85  | Formic acid dodecyl ester                                                  | 21.07 | 1272 | -    | 28303-42-6   | 0.026±0.001b | 0.026±0.002b  | 1.081±0.098a  |
| 86  | Nerol                                                                      | 21.57 | 1286 | 1229 | 106-25-2     | 1.410±0.044a | 1.425±0.136a  | 0.170±0.070b  |
| 87  | 6-methyl-pentadecane                                                       | 21.95 | 1296 | -    | 10105-38-1   | 0.004±0.003b | 0.002±0.004b  | 2.638±1.95a   |
| 88  | 2-hydroxy-benzoic acid ethyl ester                                         | 22.11 | 1301 | 1267 | 118-61-6     | 0.009±0.002b | 0.008±0.001b  | 0.386±0.033a  |
| 89  | m-Aminophenylacetylene                                                     | 22.86 | 1322 | -    | 54060-30-9   | 0.005±0.001b | 0.004±0.001b  | 0.046±0.002a  |
| 90  | Tridecane                                                                  | 23.15 | 1330 | -    | 629-50-5     | 0.013±0.002b | 0.012±0.001b  | 0.035±0.008a  |
| 91  | 7-Tetradecene                                                              | 23.87 | 1350 | -    | 10374-74-0   | 0.002±0.000b | 0.003±0.000b  | 0.007±0.001a  |
| 92  | Dodecane, 1-iodo-                                                          | 24.03 | 1355 | -    | 4292-19-7    | 0.042±0.006a | 0.041±0.001a  | 0.021±0.004b  |
| 93  | Heptadecane, 7-methyl-                                                     | 24.35 | 1364 | -    | 20959-33-5   | 0.023±0.003a | 0.027±0.002a  | 0.025±0.002a  |
| 94  | Nonadecane, 9-methyl-                                                      | 24.47 | 1367 | -    | 13287-24-6   | 0.001±0.000b | 0.002±0.000b  | 0.005±0.000a  |
| 95  | (E)-Hex-3-enyl (E)-2-methylbut-2-enoate                                    | 24.53 | 1369 | -    | 1000373-74-1 | 0.005±0.001b | 0.007±0.001ab | 0.009±0.002a  |
| 96  | Eicosane, 10-methyl-                                                       | 24.71 | 1374 | -    | 54833-23-7   | 0.011±0.001a | 0.013±0.001a  | 0.011±0.007a  |
| 97  | Tridecane, 5-methyl-                                                       | 24.94 | 1381 | -    | 25117-31-1   | 0.006±0.001b | 0.007±0.001b  | 0.015±0.001a  |
| 98  | Tetradecane, 4-methyl-                                                     | 25.49 | 1396 | 1377 | 25117-24-2   | 0.013±0.002c | 0.027±0.003b  | 0.068±0.007a  |
| 99  | (Z)-hexanoic acid, 3-hexenyl ester                                         | 25.88 | 1407 | 1381 | 31501-11-8   | 0.175±0.003b | 0.224±0.014a  | 0.035±0.006c  |
| 100 | cis-3-Hexenyl cis-3-hexenoate                                              | 26.04 | 1412 | 1389 | 61444-38-0   | 0.063±0.094a | 0.012±0.001b  | 0.010±0.001b  |
| 101 | 1-Tetradecanol                                                             | 26.20 | 1416 | 1396 | 112-72-1     | 0.006±0.000c | 0.011±0.003b  | 0.022±0.003a  |
| 102 | 2-Cyclopenten-1-one, 3-methyl-2-(2-pentenyl)-, (Z)-                        | 26.43 | 1422 | 1402 | 488-10-8     | 0.011±0.000a | 0.011±0.003a  | 0.002±0.000b  |
| 103 | Tetradecane                                                                | 26.46 | 1423 | -    | 629-59-4     | 0.045±0.002c | 0.063±0.004b  | 0.156±0.020a  |
| 104 | 2-epi- $\alpha$ -Funebrene                                                 | 26.88 | 1435 | 1419 | 65354-33-8   | 0.003±0.000b | 0.004±0.000b  | 0.007±0.001a  |
| 105 | $\alpha$ -ionone                                                           | 27.36 | 1449 | 1426 | 127-41-3     | 0.029±0.001b | 0.027±0.003b  | 0.728±0.054a  |
| 106 | Pentadecafluorooctanoic acid, tetradecyl ester                             | 27.96 | 1466 | -    | 1000406-04-4 | 0.004±0.001b | 0.006±0.000b  | 0.012±0.002a  |
| 107 | 5,9-Undecadien-2-one, 6,10-dimethyl-, (E)-                                 | 28.14 | 1471 | 1458 | 3796-70-1    | 0.015±0.000b | 0.012±0.001b  | 0.097±0.008a  |
| 108 | 2,6,10-Trimethyltridecane                                                  | 28.41 | 1478 | 1461 | 3891-99-4    | 0.005±0.001b | 0.008±0.001b  | 0.026±0.006a  |
| 109 | Tetradecane, 3-methyl-                                                     | 28.65 | 1485 | 1468 | 18435-22-8   | 0.004±0.003b | 0.008±0.001a  | 0.002±0.002b  |
| 110 | <i>trans</i> - $\beta$ -ionone                                             | 29.18 | 1500 | 1486 | 79-77-6      | 0.420±0.003b | 0.284±0.040c  | 1.242±0.095a  |
| 111 | n-Pentadecanol                                                             | 29.33 | 1504 | 1492 | 629-76-5     | 0.003±0.000b | 0.004±0.001b  | 0.012±0.003a  |
| 112 | Pentadecane                                                                | 29.57 | 1511 | -    | 629-62-9     | 0.011±0.001b | 0.017±0.001b  | 0.035±0.007a  |
| 113 | Sulfurous acid, butyl tetradecyl ester                                     | 29.74 | 1516 | -    | 1000309-18-1 | 0.009±0.002a | 0.009±0.000a  | 0.007±0.003a  |
| 114 | Pentanoic acid, 5-hydroxy-, 2,4-di-t-butylphenyl esters                    | 29.94 | 1521 | -    | 166273-38-7  | 0.045±0.002a | 0.045±0.008a  | 0.034±0.007b  |
| 115 | Butylated Hydroxytoluene                                                   | 30.00 | 1523 | 1511 | 128-37-0     | 0.035±0.002b | 0.041±0.003b  | 0.109±0.009a  |
| 116 | Naphthalene, 1,2,3,4-tetrahydro-1,6-dimethyl-4-(1-methylethyl)-, (1S-cis)- | 30.33 | 1532 | 1517 | 483-77-2     | 0.060±0.002a | 0.038±0.010b  | 0.013±0.007c  |
| 117 | 6-Tetradecanesulfonic acid, butyl ester                                    | 30.45 | 1536 | -    | 1000280-27-4 | 0.004±0.000c | 0.009±0.001b  | 0.017±0.004a  |
| 118 | Undecane, 3,8-dimethyl-                                                    | 30.83 | 1546 | -    | 17301-30-3   | 0.023±0.004b | 0.021±0.001b  | 0.033±0.006a  |

|     |                                                   |       |      |      |              |              |              |               |
|-----|---------------------------------------------------|-------|------|------|--------------|--------------|--------------|---------------|
| 119 | 1,2-Benzenediol, O-(1-naphthoyl)-                 | 31.03 | 1552 | -    | 1000325-94-2 | 0.054±0.006b | 0.075±0.004a | 0.011±0.001c  |
| 120 | n-Nonylcyclohexane                                | 31.13 | 1555 | 1556 | 2883-02-5    | 0.006±0.001b | 0.010±0.001a | 0.008±0.013ab |
| 121 | 1,6,10-Dodecatrien-3-ol, 3,7,11-trimethyl-, (E)-  | 31.63 | 1569 | 1569 | 40716-66-3   | 0.058±0.002a | 0.050±0.007a | 0.005±0.001b  |
| 122 | Pentadecane, 3-methyl-                            | 31.85 | 1575 | 1570 | 2882-96-4    | 0.005±0.000c | 0.009±0.001b | 0.019±0.003a  |
| 123 | 3-Hexen-1-ol, benzoate, (Z)-                      | 31.88 | 1576 | 1573 | 25152-85-6   | 0.019±0.002a | 0.015±0.000a | 0.019±0.020a  |
| 124 | Glutaric acid, butyl isobutyl ester               | 32.17 | 1584 | -    | 1000358-25-1 | 0.021±0.002a | 0.022±0.000a | 0.018±0.002a  |
| 125 | Cyclopropane, 1-methyl-1-(1-methylethyl)-2-nonyl- | 32.40 | 1591 | -    | 41977-40-6   | 0.004±0.000c | 0.009±0.000b | 0.016±0.015a  |
| 126 | 1-Hexadecanol                                     | 32.61 | 1597 | 1609 | 36653-82-4   | 0.003±0.000b | 0.004±0.000b | 0.007±0.002a  |
| 127 | Hexadecane                                        | 32.84 | 1603 | -    | 544-76-3     | 0.028±0.002b | 0.033±0.002b | 0.074±0.019a  |
| 128 | 5,5-Diethyltridecane                              | 32.92 | 1605 | -    | 1000360-41-3 | 0.001±0.000a | 0.001±0.000a | 0.002±0.002a  |
| 129 | Adipic acid, butyl isobutyl ester                 | 34.97 | 1663 | -    | 1000324-09-3 | 0.009±0.001a | 0.009±0.001a | 0.010±0.002a  |
| 130 | Heptadecane                                       | 35.24 | 1671 | -    | 629-78-7     | 0.008±0.001b | 0.008±0.001b | 0.012±0.002a  |
| 131 | Pentadecane, 2,6,10,14-tetramethyl-               | 35.36 | 1674 | 1707 | 1921-70-6    | 0.006±0.001a | 0.008±0.001a | 0.007±0.002a  |
| 132 | Undecane, 4,4-dimethyl-                           | 36.18 | 1702 | -    | 17312-68-4   | 0.003±0.000b | 0.004±0.001b | 0.007±0.002a  |
| 133 | Heptadecane, 3-methyl-                            | 36.51 | 1735 | 1771 | 6418-44-6    | 0.002±0.000b | 0.002±0.000b | 0.004±0.001a  |
| 134 | Decane, 3,8-dimethyl-                             | 36.96 | 1780 | 1804 | 17312-55-9   | 0.007±0.002b | 0.008±0.003b | 0.031±0.033a  |
| 135 | 2-Ethylhexyl salicylate                           | 37.09 | 1792 | 1816 | 118-60-5     | 0.005±0.002c | 0.010±0.004b | 0.037±0.038a  |
| 136 | Caffeine                                          | 37.65 | 1848 | 1842 | 58-08-2      | 0.128±0.012a | 0.119±0.028a | 0.051±0.051b  |
| 137 | Phthalic acid, hept-4-yl isobutyl ester           | 37.98 | 1881 | -    | 1000356-78-3 | 0.115±0.016a | 0.089±0.020b | 0.070±0.025c  |
| 138 | Borane, diethyl(decyloxy)-                        | 38.34 | 1916 | -    | 1000152-34-3 | 0.001±0.000b | 0.001±0.000b | 0.006±0.002a  |
| 139 | Dibutyl phthalate                                 | 39.16 | 1997 | 1967 | 84-74-2      | 0.065±0.015b | 0.052±0.008c | 0.096±0.041a  |
| 140 | Hexadecanoic acid, ethyl ester                    | 39.48 | 2006 | 1978 | 628-97-7     | 0.069±0.006a | 0.041±0.009b | 0.067±0.056a  |
| 141 | Neophytadiene                                     | 40.75 | 2155 | 1840 | 504-96-1     | 0.024±0.002a | 0.014±0.002b | 0.016±0.004b  |

Note: RI<sup>a</sup>: the linear retention indices calculated from a series of n-alkanes (C7-C40); RI<sup>b</sup>: retention indices referred to the literature value with HP-5MS column or equivalent chromatographic column [NIST Chemistry WebBook (<http://webbook.nist.gov/chemistry>)]. Data are presented as mean ± standard deviation (n=3). Mean values with different lowercase letters in the same column indicate significant differences based on the least significant difference (LSD) test ( $p < 0.05$ ).

**Table S2.** The contents and proportion of different volatile metabolites types in BT, BoS, and STL.

| Volatiles types       |                | BT            | BoS           | STL           |
|-----------------------|----------------|---------------|---------------|---------------|
| Alcohols              | Content (μg/g) | 8.333±0.425c  | 9.678±0.410b  | 17.947±0.607a |
|                       | proportion     | 0.301±0.003b  | 0.360±0.008a  | 0.317±0.026b  |
| Esters                | Content (μg/g) | 2.375±0.213b  | 2.288±0.193b  | 21.343±5.100a |
|                       | proportion     | 0.086±0.009b  | 0.085±0.005b  | 0.372±0.051a  |
| Aldehydes             | Content (μg/g) | 12.827±0.779a | 11.097±0.744b | 2.479±0.218c  |
|                       | proportion     | 0.463±0.008a  | 0.412±0.014b  | 0.044±0.003c  |
| Ketones               | Content (μg/g) | 0.639±0.042b  | 0.439±0.045c  | 4.885±0.366a  |
|                       | proportion     | 0.023±0.002b  | 0.016±0.001c  | 0.086±0.008a  |
| Enynes and Alkynes    | Content (μg/g) | 0.437±0.031b  | 0.397±0.057b  | 3.206±0.193a  |
|                       | proportion     | 0.016±0.001b  | 0.015±0.002b  | 0.057±0.004a  |
| Aromatic hydrocarbons | Content (μg/g) | 1.765±0.063b  | 1.224±0.179c  | 2.912±0.328a  |
|                       | proportion     | 0.064±0.006a  | 0.046±0.008b  | 0.051±0.003b  |
| Alkanes               | Content (μg/g) | 0.927±0.553c  | 1.450±0.195b  | 4.069±1.271a  |
|                       | proportion     | 0.033±0.019c  | 0.054±0.005b  | 0.071±0.021a  |
| Others                | Content (μg/g) | 0.367±0.014a  | 0.348±0.067a  | 0.107±0.018b  |
|                       | proportion     | 0.013±0.001a  | 0.013±0.003a  | 0.002±0.000b  |

|                                                          |                     |                     |                     |
|----------------------------------------------------------|---------------------|---------------------|---------------------|
| Total content of aroma substances<br>( $\mu\text{g/g}$ ) | 27.669 $\pm$ 1.335b | 26.921 $\pm$ 1.284b | 56.948 $\pm$ 6.912a |
|----------------------------------------------------------|---------------------|---------------------|---------------------|

Note: BT, black tea; BoS, black tea and *Strobilanthes tonkinensis* Lindau; STL, *Strobilanthes tonkinensis* Lindau. Data are presented as mean  $\pm$  standard deviation (n=3). Mean values with different lowercase letters in the same column indicate significant differences based on the least significant difference (LSD) test ( $p < 0.05$ ).

**Table S3.** List of the differential volatile metabolites among BT, BoS, and STL.

| No. | Name                                             | BT                 | BoS                | STL                 |
|-----|--------------------------------------------------|--------------------|--------------------|---------------------|
| 13  | Hexanal                                          | 0.396 $\pm$ 0.020a | 0.223 $\pm$ 0.084b | 0.042 $\pm$ 0.007c  |
| 14  | (E)-2-hexenal                                    | 1.214 $\pm$ 0.039a | 0.661 $\pm$ 0.117b | 0.042 $\pm$ 0.008c  |
| 15  | 1-Methyl-1H-1,2,4-triazole                       | 1.214 $\pm$ 0.039a | 0.661 $\pm$ 0.117b | 0.042 $\pm$ 0.008c  |
| 16  | (E)-3-hexen-1-ol                                 | 0.774 $\pm$ 0.062b | 0.963 $\pm$ 0.229a | 0.058 $\pm$ 0.011c  |
| 18  | Cis-2-methyl-cyclopentanol                       | 0.085 $\pm$ 0.006b | 0.176 $\pm$ 0.036a | 0.011 $\pm$ 0.015c  |
| 19  | 1-hexanol                                        | 0.489 $\pm$ 0.019b | 0.751 $\pm$ 0.191a | 0.020 $\pm$ 0.005c  |
| 26  | Benzaldehyde                                     | 1.172 $\pm$ 0.105b | 0.797 $\pm$ 0.232c | 1.547 $\pm$ 0.109a  |
| 28  | 1-octen-3-ol                                     | 0.169 $\pm$ 0.009c | 0.837 $\pm$ 0.131b | 1.366 $\pm$ 0.150a  |
| 34  | Decane                                           | 0.011 $\pm$ 0.001c | 0.837 $\pm$ 0.131a | 0.522 $\pm$ 0.767b  |
| 39  | 1,7,7-trimethyl-bicyclo[2.2.1]hept-2-ene         | 0.003 $\pm$ 0.006b | 0.000 $\pm$ 0.000c | 1.475 $\pm$ 0.113a  |
| 42  | 2-ethyl-1-hexanol                                | 0.052 $\pm$ 0.003b | 0.048 $\pm$ 0.004b | 2.121 $\pm$ 0.139a  |
| 43  | 1-phenyl-1,2-propanediol                         | 0.556 $\pm$ 0.057b | 0.566 $\pm$ 0.057b | 1.663 $\pm$ 0.144a  |
| 45  | 3,6,6-trimethyl-bicyclo[3.1.1]hept-2-ene         | 0.000 $\pm$ 0.000b | 0.000 $\pm$ 0.000b | 0.759 $\pm$ 0.061a  |
| 46  | Benzeneacetaldehyde                              | 9.160 $\pm$ 0.633a | 8.502 $\pm$ 0.755a | 0.557 $\pm$ 0.095b  |
| 47  | 3-Carene                                         | 0.000 $\pm$ 0.000b | 0.000 $\pm$ 0.000b | 0.758 $\pm$ 0.061a  |
| 48  | Isophorone                                       | 0.041 $\pm$ 0.001b | 0.025 $\pm$ 0.002c | 2.423 $\pm$ 0.252a  |
| 55  | 3,7-Dimethyl-2,3,3a,4,5,6-hexahydro-1-benzofuran | 0.033 $\pm$ 0.002c | 0.062 $\pm$ 0.048b | 1.827 $\pm$ 0.164a  |
| 57  | Linalool                                         | 2.247 $\pm$ 0.115a | 2.232 $\pm$ 0.132a | 0.095 $\pm$ 0.021b  |
| 59  | Phenylethyl alcohol                              | 1.785 $\pm$ 0.142a | 1.887 $\pm$ 0.222a | 0.461 $\pm$ 0.114b  |
| 60  | 4-chloro-2-methyl-1-phenyl-3-buten-1-ol          | 0.219 $\pm$ 0.011b | 0.217 $\pm$ 0.013b | 1.263 $\pm$ 0.370a  |
| 62  | 3,3,5-trimethyl-heptane                          | 0.378 $\pm$ 0.151a | 0.023 $\pm$ 0.012b | 0.016 $\pm$ 0.004b  |
| 70  | Linalool oxide (pyranoid)                        | 0.192 $\pm$ 0.017b | 0.174 $\pm$ 0.027b | 7.846 $\pm$ 0.370a  |
| 72  | 2-methoxy-3-(2-methylpropyl)-Pyrazine            | 0.003 $\pm$ 0.000b | 0.003 $\pm$ 0.000b | 0.615 $\pm$ 0.022a  |
| 73  | (Z)-butanoic acid, 3-hexenyl ester               | 0.022 $\pm$ 0.004c | 0.035 $\pm$ 0.006b | 1.317 $\pm$ 1.003a  |
| 75  | 1-dodecanol                                      | 0.001 $\pm$ 0.001b | 0.001 $\pm$ 0.001b | 2.032 $\pm$ 0.133a  |
| 82  | cis-3-Hexenyl- $\alpha$ -methylbutyrate          | 0.061 $\pm$ 0.003b | 0.067 $\pm$ 0.005b | 1.124 $\pm$ 0.323a  |
| 83  | n-Valeric acid cis-3-hexenyl ester               | 0.017 $\pm$ 0.001b | 0.021 $\pm$ 0.003b | 15.670 $\pm$ 4.899a |
| 85  | Formic acid dodecyl ester                        | 0.026 $\pm$ 0.001b | 0.026 $\pm$ 0.002b | 1.081 $\pm$ 0.098a  |
| 86  | Nerol                                            | 1.410 $\pm$ 0.044a | 1.425 $\pm$ 0.136a | 0.170 $\pm$ 0.070b  |
| 87  | 6-methyl-pentadecane                             | 0.004 $\pm$ 0.003b | 0.002 $\pm$ 0.004b | 2.638 $\pm$ 1.95a   |
| 99  | (Z)-hexanoic acid, 3-hexenyl ester               | 0.175 $\pm$ 0.003b | 0.224 $\pm$ 0.014a | 0.035 $\pm$ 0.006c  |
| 105 | $\alpha$ -ionone                                 | 0.029 $\pm$ 0.001b | 0.027 $\pm$ 0.003b | 0.728 $\pm$ 0.054a  |
| 110 | trans- $\beta$ -ionone                           | 0.420 $\pm$ 0.003b | 0.284 $\pm$ 0.040c | 1.242 $\pm$ 0.095a  |

Note: Data are presented as mean  $\pm$  standard deviation (n=3). Mean values with different lowercase letters in the same column indicate significant differences based on the least significant difference (LSD) test ( $p < 0.05$ ).
